# Supplementary material
Source: Springer Nature journal article supplement (https://www.springermedizin.de/resource/supplementary/12874_2012_951_MOESM1_ESM.pdf/9433230)
Supplement: MOESM1 [file 9433230]

Top 200 universities listed in Times Higher Education World University Rankings 2009.

A total of 135 universities was excluded by stratification.

Stratification by choosing a maximum of top 15 countries in each continent: A total of 65 universities remained.

Geographical distribution of 65 universities is as follows:

Africa: 3  
America (North): 10  
America (South): 1  
Asia (Central/ Middle East): 3  
Asia (North/East): 13  
Australia and New Zealand: 6  
Europe: 29

A total of 28009 medical faculties was identified and invited to participate. Geographical distribution of potential participants is as follows:

Africa: 188  
America (North): 13425  
America (South): 271  
Asia (Central/ Middle East): 789  
Asia (North/East): 3291  
Australia and New Zealand: 1994  
Europe: 8051

A total of 1340 medical faculties completed the online surveys. Geographical distribution of respondents is as follows:

Africa: 14 (7.45 % response rate)  
America (North): 511 (3.81% response rate)  
American (South): 20 (7.38% response rate)  
Asia (Central/ Middle East): 74 (9.38% response rate)  
Asia (North/East): 96 (2.92% response rate)  
Australia and New Zealand: 109 (5.47% response rate)  
Europe: 516 (6.41% response rate)
